# Supplementary material for: Decision Support for Oropharyngeal Cancer Patients Based on Data-Driven Similarity Metrics for Medical Case Comparison
Source: MDPI journal article supplement (doi:10.3390/diagnostics12040999), 2022-04-15
Supplement: s1 [file s1]

## Supplement Tables

Table S1: Patient-related factors for the primary treatment decision of three example patients of the dataset.

| Patient | Gender | Age | ECOG | Pre-existing illness | Alcohol Consumption | Tobacco Smoke |
|---------|--------|-----|------|----------------------|---------------------|---------------|
| 1       | Male   | 62  | 0    | None                 | Yes                 | Yes           |
| 2       | Female | 59  | 1    | None                 | Yes                 | Yes           |
| 3       | Male   | 70  | 2    | None                 | Yes                 | Yes           |

Table S2: Diagnosis-related factors for the primary treatment decision of three example patients of the dataset.

| Patient | T-State | N-State | M-State | HPV      | Grading | Infiltrations                    |
|---------|---------|---------|---------|----------|---------|----------------------------------|
| 1       | T3      | N3b     | M0      | Negative | G2      | Tongue, IJV                      |
| 2       | T4a     | N2c     | M0      | Positive | G2      | Tongue, Hypopharynx, Nasopharynx |
| 3       | T4b     | N3      | M1      | Negative | G2      | Tongue, IJV                      |

Table S3: Diagnosis-related factors for the adjuvant treatment decision of three example patients of the dataset.

| Patient | Primary therapy              | Resection margin | Vascular invaion | Perineural invasion | Lymphatic invasion | ESC      |
|---------|------------------------------|------------------|------------------|---------------------|--------------------|----------|
| 1       | Surgery                      | R0               | V1               | Pn1                 | L1                 | Positive |
| 2       | Definitve radiochemo-therapy | Not applicable   | Vx               | Pnx                 | L1                 | Negative |
| 3       | Palliative radiotherapy      | Not applicable   | Vx               | Pnx                 | Lx                 | Negative |
